# Supplementary material for: Needs Assessment of Digital Technology in Co-Creation: A Health CASCADE Scoping Review
Source: Research Square preprint supplement (doi:10.21203/rs.3.rs-6819176/v1), 2025-06-18
Supplement: Supplementary file 2 [file b84430bd937b13e1774b5160.pdf]

### Additional file 3: List of Included Studies

| Authors & Year                | Need Identified                                                                                   | Scientific Field                                        | Study Type                            | Study Aim                                                                                                                                                                                                                   | Co-Creation Process                                  |
|-------------------------------|---------------------------------------------------------------------------------------------------|---------------------------------------------------------|---------------------------------------|-----------------------------------------------------------------------------------------------------------------------------------------------------------------------------------------------------------------------------|------------------------------------------------------|
| Aboucaya et al., 2022         | 176, 195, 197, 204, 233, 242, 322                                                                 | E-government, Civic Tech                                | Empirical Study                       | To analyse flaws in participatory platforms and provide recommendations for enhancing citizen engagement                                                                                                                    | Online Participatory Democracy Platform              |
| Aikins, 2010                  | 56, 57, 71, 226, 270, 300                                                                         | Urban Planning, E-Government                            | Theoretical Study with Case Review    | To explore how information technology (IT) can bridge theory and practice in participatory urban e-planning                                                                                                                 | E-Planning (Co-creation in Urban Planning)           |
| Arsenopoulos et al., 2020     | 188, 253                                                                                          | Public Policy & ICT                                     | Empirical Development and Evaluation  | To develop and showcase a software-based platform that enhances public participation in decision-making, especially in addressing socio-economic and energy-related issues through crowdsourcing and open data integration. | Participatory E-Design                               |
| Barenji et al., 2021          | 18, 213, 288                                                                                      | Manufacturing & ICT                                     | Theoretical Framework and Case Study  | To propose and evaluate a blockchain and fog computing-based collaborative design and manufacturing platform to enhance customer collaboration and integrate feedback securely within the manufacturing process.            | Collaborative Design & Manufacturing                 |
| Bucchetti et al., 2024        | 62, 113, 126, 190                                                                                 | Communication Design & Social Welfare                   | Theoretical Framework with Case Study | To explore communication design strategies for remote participatory processes, particularly for enhancing human interactions and inclusivity in virtual settings.                                                           | Remote Co-Design                                     |
| Chen, 2021                    | 123                                                                                               | Virtual Reality & Design                                | Theoretical Framework and Case Study  | To explore the use of Virtual Reality and telepresence systems in co-design research to enhance collaborative creation and user immersion.                                                                                  | Hybrid Co-Design                                     |
| Constantin and Hourcade, 2018 | 247                                                                                               | Human-Computer Interaction & Autism Research            | Empirical Development and Evaluation  | To develop a technology-based tool to facilitate brainstorming in participatory design (PD) sessions with children with Autism Spectrum Disorders (ASD), helping to reduce anxiety and enhance creativity.                  | Participatory Design with ASD Focus                  |
| Constantin et al., 2021       | 2, 27, 72, 88, 89, 116, 118, 127, 128, 162, 167, 198, 241, 248, 249, 271, 272, 289, 290, 311, 320 | Human-Computer Interaction & Child-Computer Interaction | Opinion Paper & Case Review           | To explore distributed participatory design (DPD) with children and to address the unique challenges and opportunities presented by remote participation, especially during the COVID-19 pandemic.                          | Distributed Participatory Design (DPD) with Children |
| Dalsgaard et al., 2022        | 3, 13, 63, 207, 250                                                                               | Urban Development & Public Institutions                 | Case Study Analysis                   | To examine the challenges of participatory design in large-scale public projects, particularly within the development of a multimedia public library.                                                                       | Participatory Design                                 |

|                             |                                               |                                                                           |                                             |                                                                                                                                                                                     |                                            |
|-----------------------------|-----------------------------------------------|---------------------------------------------------------------------------|---------------------------------------------|-------------------------------------------------------------------------------------------------------------------------------------------------------------------------------------|--------------------------------------------|
| Du et al., 2024             | 100, 183, 306                                 | Urban Planning & AI                                                       | Systematic Literature Review                | To evaluate the strengths, weaknesses, opportunities, and threats (SWOT) of integrating AI in participatory planning for urban development and to guide future improvements.        | AI-Enabled Participatory Planning          |
| Dufendach et al., 2017      | 193                                           | Healthcare                                                                | Randomised Trial                            | To reduce user effort in co-design of a software user interface by developing a web-based platform                                                                                  | Participatory Design                       |
| Eilola et al., 2021         | 177, 194                                      | Land Use and Environmental Planning                                       | Case Study                                  | To examine the benefits and limitations of participatory mapping using high-resolution remote sensing images in Tanzania                                                            | Participatory Mapping                      |
| Fessler et al., 2024        | 4, 168, 329                                   | Urban Planning & Gender Studies                                           | Case Study                                  | To explore the use of digital tools in promoting gender-responsive public spaces                                                                                                    | Digitally Supported Participation          |
| Fredericks and Foth, 2013   | 5, 175, 184                                   | Urban Planning                                                            | Case Study                                  | To explore the role of social media and web 2.0 tools in enhancing public participation in planning                                                                                 | Augmented Public Participation             |
| García-Holgado et al., 2020 | 161, 227                                      | Citizen Science & Digital Society                                         | Framework Analysis with Case Study          | To analyse the WYRED framework for engaging young people in citizen science through a technological ecosystem                                                                       | Technologically Enhanced Citizen Science   |
| Giesen and Söpke, 2011      | 19, 91, 234                                   | Sustainable Project Planning & Environmental Engineering                  | System Development with Case Study          | To develop and evaluate the ProPlaNET system, a collaborative tool for sustainable project planning that incorporates participatory decision-making                                 | Collaborative Planning                     |
| Heintz and Law, 2018        | 102, 141, 190, 228, 230, 236, 254             | Human-Computer Interaction (HCI) & Participatory Design                   | Tool Development and Evaluation             | To develop and evaluate PDotCapturer and PDotAnalyser, tools supporting asynchronous idea capturing and analysis in participatory design                                            | Asynchronous Participatory Design          |
| Heintz et al., 2014         | 44, 181, 225, 330                             | Human-Computer Interaction (HCI) & Distributed Participatory Design (DPD) | Tool Development and Preliminary Evaluation | To develop and evaluate Pdot, a tool for supporting distributed participatory design with online annotation capabilities                                                            | Distributed Participatory Design           |
| Helbing et al., 2023        | 6, 38, 103, 104, 144, 232, 240, 291, 307, 312 | Digital Democracy & Computational Social Science                          | Theoretical Framework with Case Studies     | To explore how digital tools can support democratic processes, enhance civic engagement, and improve decision-making and transparency                                               | Digitally Assisted Democracy               |
| Hennig et al., 2023         | 166, 229                                      | Geospatial Technologies & Citizen Science                                 | Case Study                                  | To create a youth-centred data collection tool for contributing spatial data on urban green areas to promote child- and youth-friendly urban development.                           | User-Centered Contributory Citizen Science |
| Hess et al., 2013           | 45, 129, 212, 231, 235, 273, 274, 323         | Human-Computer Interaction & Participatory Design                         | Case Study                                  | To explore participatory product development with online communities using social technologies, highlighting challenges in heterogeneity, role management, and process structuring. | Distributed Participatory Design           |
| Horlitz, 2007               | 14, 39, 281, 313                              | Water Management & Participatory Planning                                 | Theoretical Framework and Case Analysis     | To explore the role of model interfaces in supporting participatory water management and improving public engagement through accessible and interactive tools                       | Interactive Public Participation           |
| Jannack et al., 2015        | 60, 61, 105, 145, 163, 174, 199, 203,         | Urban Planning & Participatory Design                                     | Theoretical Framework with Case Study       | To present a blueprint for a collaborative urban design environment that enables large-scale                                                                                        | Massive-Scale Collaborative Urban Design   |

|                                    |                                                                        |                                            |                         |                                                                                                                                                                                   |                                         |
|------------------------------------|------------------------------------------------------------------------|--------------------------------------------|-------------------------|-----------------------------------------------------------------------------------------------------------------------------------------------------------------------------------|-----------------------------------------|
|                                    | 224, 262, 263, 286, 317                                                |                                            |                         | public engagement through a structured digital co-design platform                                                                                                                 |                                         |
| Joubert and Wishart, 2012          | 73                                                                     | Technology Enhanced Learning & Education   | Comparative Case Study  | To analyse lessons learned from two initiatives using digital technologies to facilitate knowledge building among school students and researchers in participatory contexts       | Computer-Mediated Collaboration         |
| Jutraz and Zupancic, 2012 [1]      | 46, 164, 196, 208                                                      | Urban Design                               | Empirical Study         | To explore digital tools that enhance public participation in urban design through 3D ICC                                                                                         | Co-Design                               |
| Jutraz and Zupancic, 2012 [2]      | 28, 73, 92, 169, 209, 214, 326                                         | Urban Design                               | Theoretical Study       | To identify and define digital tools and criteria for effective cooperative urban design                                                                                          | Cooperative Design                      |
| Katapally, 2019                    | 17, 30, 93, 106, 142, 255, 266, 292, 318                               | Public Health, Technology                  | Theoretical Framework   | To establish a framework for integrating citizen science with participatory research in health contexts                                                                           | Citizen Science, Participatory Research |
| Kelley and Johnston, 2012          | 64, 119, 134, 202                                                      | Public Administration, Game Studies        | Theoretical Framework   | To explore how serious games can enhance public engagement and open governance platforms                                                                                          | Open Governance, Serious Games          |
| Krishnamurthy et al., 2013         | 130, 218                                                               | Public Policy, Information Systems         | Theoretical Framework   | To explore the role of information systems in generating empathy within participatory governance platforms                                                                        | Participatory Platforms                 |
| Leonardi et al., 2023              | 7, 20, 21, 42, 68, 94, 95, 107, 135, 143, 146, 245, 285, 319, 321, 324 | Public Administration                      | Case Study              | To explore the opportunities and barriers in using ICT to support cross-organizational co-design in public administrations                                                        | Co-Design                               |
| Lieven et al., 2021                | 8, 51, 52, 121, 136, 275, 276, 282, 287, 303                           | Urban Planning and Development             | Case Study              | To explore the integration of digital tools in urban co-creation processes, focusing on participation technologies such as digital touch tables and AI-based feedback mechanisms. | Co-Creation                             |
| Luusua et al., 2023                | 9, 47, 109, 110, 138                                                   | Participatory Design, Remote Collaboration | Theoretical Exploration | To explore and theorise hybrid, multi-site participatory design (HMPD) methods for culturally diverse global contexts                                                             | Hybrid Multi-site Participatory Design  |
| Mačiulienė and Skaržauskienė, 2016 | 22, 131, 251, 301, 314                                                 | Business Research                          | Empirical Research      | To assess the co-creation capabilities of networked collaboration platforms using social indices                                                                                  | Networked Collaboration Platforms       |
| Mahmoud and Arima, 2011            | 48, 147, 189, 331                                                      | Urban Planning                             | Case Study              | To develop and evaluate a web-based Decision Support System (DSS) for enhanced public participation in decision-making related to urban planning.                                 | Public Participation                    |
| Mariani et al., 2023               | 43, 108, 139, 140, 153, 154                                            | Public Sector Innovation                   | Literature Review       | To explore how design thinking methodologies can reinforce e-participation for improved digital public services.                                                                  | Co-Creation                             |
| Matsumoto et al., 2024             | 81, 278                                                                | Human-Computer Interaction                 | Case Study              | To explore how purpose formation can be facilitated among multiple stakeholders through AI-supported dialogue.                                                                    | Co-Creation                             |
| McCormack et al., 2020             | 86, 148, 219, 246, 295                                                 | Creative AI and Design                     | Theoretical Analysis    | To identify and discuss design considerations for real-time,                                                                                                                      | Co-Creation                             |

|                                             |                                                                                      |                                              |                                  |                                                                                                                                                                       |                         |
|---------------------------------------------|--------------------------------------------------------------------------------------|----------------------------------------------|----------------------------------|-----------------------------------------------------------------------------------------------------------------------------------------------------------------------|-------------------------|
|                                             |                                                                                      |                                              |                                  | collaborative AI systems in creative settings.                                                                                                                        |                         |
| Mougiakou et al., 2023                      | 50, 293                                                                              | Urban Planning and Environmental Science     | Case Study                       | To develop and apply a methodological framework for participatory spatial planning using WebGIS tools, particularly for urban areas with unique challenges.           | Public Participation    |
| Münster et al., 2017                        | 1, 15, 29, 69, 155, 156, 205, 279, 280, 315, 316                                     | Urban Planning & Digital Tools               | Literature Review & Case Studies | To examine how digital tools can enhance public participation in urban design and identify key challenges and promising methods for massive-scale participation.      | Public Participation    |
| Panagiotopoulou and Stratigea, 2017         | 31, 96, 173, 178, 215, 216, 267, 268, 277, 308, 325, 332, 333                        | Urban Planning & ICT                         | Literature Review                | To explore the use of spatial data management and visualization tools in enhancing participatory e-planning within smart city contexts.                               | Public Participation    |
| Pejovic and Skarlatidou, 2020               | 157, 170, 296, 334, 335                                                              | Human-Computer Interaction & Citizen Science | Empirical Research               | To explore design challenges in mobile interaction for extreme citizen science, focusing on usability issues in rural, developing regions.                            | Extreme Citizen Science |
| Pipan, 2018                                 | 23, 101, 182, 210                                                                    | Urban Planning                               | Comparative Study                | To explore how interactive tangible planning support systems (PSSs) can enhance access to non-professionals' spatial data and support stakeholder consensus-making.   | Co-Creation             |
| Recalde et al., 2020                        | 24                                                                                   | Urban Planning                               | Prototype Development            | To develop a cognitive urban planning platform prototype that integrates citizen collaboration to improve urban resilience.                                           | Co-Creation             |
| Reith et al., 2021                          | 112, 124, 132, 133, 201, 252                                                         | Landscape Architecture                       | Case Study (Remote)              | To explore remote participatory design tools and methods for enhancing engagement and collaboration in schoolyard co-design.                                          | Co-Design               |
| Reynante et al., 2021                       | 16, 34, 65, 66, 74, 75, 76, 77, 82, 114, 115, 117, 158, 221, 238, 239, 260, 297, 302 | Civic Design                                 | Theoretical Framework            | To develop a framework that integrates public participation, crowdsourcing, and design thinking to address large-scale civic issues.                                  | Open Civic Design       |
| Roszczyńska-Kurasińska and Wróblewska, 2023 | 25, 26, 35, 36, 58, 87, 97, 137, 159, 222, 258                                       | Environmental Participation                  | Explorative Study                | To examine the technological solutions supporting citizen environmental participation in Poland, with a focus on grassroots movements                                 | Citizen Science         |
| Shaikh et al., 2023                         | 53, 54, 55, 149, 294, 327                                                            | E-Governance                                 | System Proposal                  | To propose a blockchain-based e-participation system that enhances democratic engagement by ensuring security, transparency, and decentralised citizen participation. | E-Participation         |
| Siemon et al., 2019                         | 152                                                                                  | Collaboration Support Systems                | Framework Proposal               | To develop a framework for collaboration support systems that enhance team performance by addressing cognitive and social factors.                                    | Collaborative Teams     |

|                                      |                                                 |                               |                                       |                                                                                                                                                                           |                                         |
|--------------------------------------|-------------------------------------------------|-------------------------------|---------------------------------------|---------------------------------------------------------------------------------------------------------------------------------------------------------------------------|-----------------------------------------|
| Skarlatidou et al., 2019             | 32, 67, 125, 160, 256, 257, 261, 305, 336       | Environmental Citizen Science | Systematic Literature Review          | To identify user needs and best practices for digital technologies in citizen science, focusing on volunteer engagement and usability.                                    | Citizen Science                         |
| Skarzauskienė et al., 2023           | 37, 78                                          | Environmental Science         | Case Study                            | To explore the role of citizen science within climate assemblies and how it can foster co-creation and engagement in climate policy development.                          | Citizen Science                         |
| Slingerland et al., 2022             | 49, 70, 79                                      | Urban Planning/Place-Making   | Case Study                            | To explore challenges and opportunities of distributed participatory design in place-making activities focusing on the impacts of digital transformation due to COVID-19. | Participatory Design                    |
| Stelzle et al., 2017                 | 10, 40, 90, 298                                 | Urban Development             | Case Study                            | To explore decision-making processes in digital participatory urban design and translate them into effective digital tools and methods                                    | Co-Design, Co-Decision                  |
| Šuklje Erjavec and Ruchinskaya, 2019 | 11, 80, 83, 165, 171, 200, 223, 269, 283, 337   | Urban Planning                | Case Study                            | To explore how co-creation and inclusiveness can be enhanced in public open spaces and the role of digital tools in facilitating these aspects.                           | Co-Creation                             |
| van Kouwen et al., 2009              | 41, 59, 84, 85                                  | Environmental Management      | Empirical Study                       | To explore computer-supported cognitive mapping for structuring complex participatory problems                                                                            | Participatory Problem Structuring       |
| Walsh and Foss, 2015                 | 33, 120, 172, 185, 186, 187, 220, 237, 243, 259 | Child-Computer Interaction    | Empirical Research                    | To develop and evaluate an online environment for distributed, intergenerational co-design involving children as design partners across locations                         | Distributed Intergenerational Co-Design |
| Whelan, 2024                         | 206, 217, 310, 328                              | Participatory Design          | Theoretical Study                     | To explore how blockchain can enhance participatory design by addressing issues related to trust, power dynamics, and participation                                       | Participatory Design                    |
| Winschiers-Theophilus et al., 2022   | 12, 191, 192                                    | Child-Computer Interaction    | Empirical Research                    | To explore distributed co-design with children across diverse geographical and cultural contexts, promoting a transcultural approach                                      | Distributed Co-Design                   |
| Wong et al., 2016                    | 122, 179                                        | Information Systems           | Theoretical and Framework Development | To examine how mobile technologies can support innovation co-creation processes and provide a roadmap for developing mobile ecosystems                                    | Innovation Co-Creation                  |
| Zellner, 2024                        | 99, 150, 151, 244, 264, 265, 299, 304, 300      | Environmental Planning        | Perspective Article                   | To explore the potential of participatory modelling in collaborative landscape and environmental planning for addressing complex issues                                   | Participatory Modeling                  |
| Zhu et al., 2011                     | 98, 111, 211, 284                               | Software Engineering          | Theoretical and Framework Development | To propose the Hive-Mind Space (HMS) model to support creative distributed collaborative design by addressing communication gaps among diverse stakeholders               | Distributed Collaborative Design        |
