# Supplementary material for: Needs Assessment of Digital Technology in Co-Creation: A Health CASCADE Scoping Review
Source: Research Square preprint supplement (doi:10.21203/rs.3.rs-6819176/v1), 2025-06-18
Supplement: Supplementary file 4 [file ea7afc18aad7f0cb60c68755.pdf]

## Additional file 4: List of the Needs

| Theme           | Sub-theme       | #   | Need Name                                                       | Expression   | Attribute      |
|-----------------|-----------------|-----|-----------------------------------------------------------------|--------------|----------------|
| Cognitive Needs | Mental Capacity | 17  | Tools for Knowledge Translation                                 | Latent       | Functional     |
| Cognitive Needs | Mental Capacity | 184 | Improved Accessibility and Clarity of Information               | Articulated  | Non-Functional |
| Cognitive Needs | Mental Capacity | 187 | Creative Expression Tools for Distributed Co-Design             | Articulated  | Functional     |
| Cognitive Needs | Mental Capacity | 193 | Effort Reduction in Co-Design Participation                     | Articulated  | Non-Functional |
| Cognitive Needs | Mental Capacity | 196 | Informative and Educational Tools for Public Participation      | Articulated  | Functional     |
| Cognitive Needs | Mental Capacity | 200 | Educational Tools for Skill and Knowledge Sharing               | Articulated  | Functional     |
| Cognitive Needs | Mental Capacity | 229 | Simplified and Intuitive Spatial Data Contribution Applications | Inferred     | Functional     |
| Cognitive Needs | Mental Capacity | 230 | Flexible Expression Tools in Idea Specification                 | Inferred     | Functional     |
| Cognitive Needs | Mental Capacity | 295 | AI with Human Mental Modelling                                  | Prescriptive | Functional     |
| Cognitive Needs | Mental Capacity | 296 | Intuitive Knowledge Organisation                                | Prescriptive | Functional     |
| Cognitive Needs | Mental Capacity | 303 | Automated Title and Text Differentiation                        | Prescriptive | Functional     |
| Cognitive Needs | Mental Capacity | 304 | ML-Driven Support Tools for Skill Development and Engagement    | Prescriptive | Functional     |
| Cognitive Needs | Mental Capacity | 305 | Multi-Format Tutorial Resources                                 | Prescriptive | Functional     |
| Cognitive Needs | Motivation      | 62  | Interactive and Stimulating Virtual Environments                | Latent       | Non-Functional |
| Cognitive Needs | Motivation      | 63  | Context-Integrated Participation Features                       | Latent       | Functional     |
| Cognitive Needs | Motivation      | 64  | Motivation Enhancement Tools for Co-Creators                    | Latent       | Functional     |
| Cognitive Needs | Motivation      | 65  | Diverse Incentive Mechanisms for Participant Engagement         | Latent       | Functional     |
| Cognitive Needs | Motivation      | 66  | Adaptive Role Assignment for Participation Platforms            | Latent       | Functional     |
| Cognitive Needs | Motivation      | 67  | Volunteer Retention Support Features                            | Latent       | Functional     |
| Cognitive Needs | Motivation      | 201 | Engaging and Meaningful Technology for Participant Involvement  | Articulated  | Non-Functional |
| Cognitive Needs | Motivation      | 202 | Enhanced Gamification Strategies for Engagement                 | Articulated  | Functional     |
| Cognitive Needs | Motivation      | 233 | Topic Recommendation System Using NLP                           | Inferred     | Functional     |
| Cognitive Needs | Motivation      | 310 | Tokenized Incentives for Active Participation                   | Prescriptive | Functional     |
| Cognitive Needs | Motivation      | 311 | ML-Powered Interest Tools with Crowdsourcing Features           | Prescriptive | Functional     |

|                 |               |     |                                                                           |              |                |
|-----------------|---------------|-----|---------------------------------------------------------------------------|--------------|----------------|
| Cognitive Needs | Motivation    | 312 | Incentive Systems for Effective Information Gathering                     | Prescriptive | Functional     |
| Cognitive Needs | Motivation    | 313 | Engaging Online Platforms for Interactive e-Participation                 | Prescriptive | Functional     |
| Cognitive Needs | Motivation    | 314 | Advanced Gamification Features                                            | Prescriptive | Functional     |
| Cognitive Needs | Motivation    | 315 | Gamification for Enhanced Motivation                                      | Prescriptive | Functional     |
| Cognitive Needs | Motivation    | 316 | Sustained Engagement through Gamification                                 | Prescriptive | Functional     |
| Cognitive Needs | Visualisation | 101 | Simplified Data Visualization for Non-Specialists                         | Latent       | Functional     |
| Cognitive Needs | Visualisation | 235 | Visualization Tools for Context-Focused Discussion                        | Inferred     | Functional     |
| Cognitive Needs | Visualisation | 329 | Enhanced Data Collection and Visualization for Gender-Responsive Planning | Prescriptive | Functional     |
| Cognitive Needs | Visualisation | 330 | Support for Graphical Feedback in Distributed PD Tools                    | Prescriptive | Functional     |
| Cognitive Needs | Visualisation | 331 | Enhanced Visualization Tools                                              | Prescriptive | Functional     |
| Cognitive Needs | Visualisation | 332 | Large-Scale Spatial Data Visualization                                    | Prescriptive | Functional     |
| Cognitive Needs | Visualisation | 333 | Management and Visualition of Large Data Set                              | Prescriptive | Functional     |
| Cognitive Needs | Visualisation | 334 | Accessible Data Representation                                            | Prescriptive | Non-Functional |
| Cognitive Needs | Visualisation | 335 | Offline Data Visualization Capability                                     | Prescriptive | Functional     |
| Cognitive Needs | Visualisation | 336 | Visual Aids in Educational Content                                        | Prescriptive | Functional     |
| Cognitive Needs | Visualisation | 337 | Cost-Effective Engagement and Visualization Tools                         | Prescriptive | Functional     |
| Group Dynamics  | Collaboration | 18  | Efficient and Trustworthy Customer Feedback Integration                   | Latent       | Functional     |
| Group Dynamics  | Collaboration | 19  | Widespread Integrated Collaborative Planning Tools                        | Latent       | Functional     |
| Group Dynamics  | Collaboration | 20  | Problem-Solving and Consensus-Building Tools                              | Latent       | Functional     |
| Group Dynamics  | Collaboration | 21  | Cross-Organizational Collaborative Platforms                              | Latent       | Functional     |
| Group Dynamics  | Collaboration | 22  | Collaboration Organization Tools for Diverse Actor Networks               | Latent       | Functional     |
| Group Dynamics  | Collaboration | 23  | Tools for Facilitating Stakeholder Consensus                              | Latent       | Functional     |
| Group Dynamics  | Collaboration | 24  | Technology to Enable Collaboration                                        | Latent       | Functional     |
| Group Dynamics  | Collaboration | 25  | Networking Tools for Cross-Organizational Collaboration                   | Latent       | Functional     |
| Group Dynamics  | Collaboration | 26  | Basic Collaborative Tools for Enhanced Non-Profit Efficiency              | Latent       | Functional     |
| Group Dynamics  | Collaboration | 86  | Enhancing Collaborative Creativity                                        | Latent       | Functional     |

|                |               |     |                                                                             |              |                |
|----------------|---------------|-----|-----------------------------------------------------------------------------|--------------|----------------|
| Group Dynamics | Collaboration | 87  | Collaborative Tools for Defining Research Questions                         | Latent       | Functional     |
| Group Dynamics | Collaboration | 162 | Asynchronous Tools for Global Collaboration                                 | Articulated  | Functional     |
| Group Dynamics | Collaboration | 163 | Collaborative Platforms for Shared Project Development                      | Articulated  | Functional     |
| Group Dynamics | Collaboration | 164 | Holistic Platform for Communication and Collaboration in Design             | Articulated  | Functional     |
| Group Dynamics | Collaboration | 165 | Scalable and Efficient Digital Collaboration Tools                          | Articulated  | Non-Functional |
| Group Dynamics | Collaboration | 174 | Collaborative Creative Space for Public Engagement                          | Articulated  | Functional     |
| Group Dynamics | Collaboration | 180 | Enhanced Feedback Integration in Participatory Design Tools                 | Articulated  | Functional     |
| Group Dynamics | Collaboration | 181 | Powerful and User-Friendly Annotation Tool                                  | Articulated  | Functional     |
| Group Dynamics | Collaboration | 219 | AI Explanation and Justification                                            | Inferred     | Functional     |
| Group Dynamics | Collaboration | 242 | Collaborative Editing for Proposal Development                              | Prescriptive | Functional     |
| Group Dynamics | Collaboration | 243 | Tools for Asynchronous and Time-Zone Flexible Collaboration                 | Prescriptive | Functional     |
| Group Dynamics | Collaboration | 244 | User-Friendly Scenario Testing and Reflection Tools                         | Prescriptive | Functional     |
| Group Dynamics | Collaboration | 263 | Collaborative Tools for Harnessing Public Creativity and Sentiment Analysis | Prescriptive | Functional     |
| Group Dynamics | Collaboration | 271 | Real-Time Feedback Mechanisms for Children in DPD                           | Prescriptive | Functional     |
| Group Dynamics | Collaboration | 273 | Module-Specific Feedback Collection Tools                                   | Prescriptive | Functional     |
| Group Dynamics | Collaboration | 274 | In-Situ Feedback Tools for Real-Time User Input                             | Prescriptive | Functional     |
| Group Dynamics | Communication | 27  | Enhanced Non-Verbal Communication Tools                                     | Latent       | Functional     |
| Group Dynamics | Communication | 28  | User-Friendly and Inclusive Digital Communication Interfaces                | Latent       | Non-Functional |
| Group Dynamics | Communication | 29  | Effective Communication Strategies                                          | Latent       | Non-Functional |
| Group Dynamics | Communication | 31  | Digital Communication Tools for e-Planning                                  | Latent       | Functional     |
| Group Dynamics | Communication | 32  | Volunteer Communication Support Tools                                       | Latent       | Functional     |
| Group Dynamics | Communication | 33  | Enhanced Communication Tools for Distributed Teams                          | Latent       | Functional     |
| Group Dynamics | Communication | 220 | Multimodal Communication Tools                                              | Inferred     | Functional     |
| Group Dynamics | Communication | 245 | Multi-Function Communication Platforms                                      | Prescriptive | Functional     |
| Group Dynamics | Communication | 246 | Advanced Communication Mechanisms                                           | Prescriptive | Functional     |
| Group Dynamics | Communication | 252 | Non-Verbal and Visual Communication Tools                                   | Prescriptive | Functional     |
| Group Dynamics | Communication | 260 | Synchronous and Asynchronous Communication Modes                            | Prescriptive | Functional     |

|                |                          |     |                                                                      |              |            |
|----------------|--------------------------|-----|----------------------------------------------------------------------|--------------|------------|
| Group Dynamics | Communication            | 261 | Real-Time Communication Tools for Volunteers                         | Prescriptive | Functional |
| Group Dynamics | Mitigating Conflict      | 81  | Goal Alignment for Diverse Stakeholders                              | Latent       | Functional |
| Group Dynamics | Mitigating Conflict      | 82  | Conflict Resolution Tools for Diverse Stakeholder Engagement         | Latent       | Functional |
| Group Dynamics | Mitigating Conflict      | 83  | Bridging Tools for Knowledge Integration                             | Latent       | Functional |
| Group Dynamics | Mitigating Conflict      | 84  | Tools for Managing Stakeholder Conflict and Knowledge Integration    | Latent       | Functional |
| Group Dynamics | Mitigating Conflict      | 85  | Flexible Systems for Structuring Uncertain and Complex Problems      | Latent       | Functional |
| Group Dynamics | Mitigating Conflict      | 224 | Constructive Discourse Facilitation in Large-Scale Public Engagement | Inferred     | Functional |
| Group Dynamics | Mitigating Conflict      | 262 | Moderation and Translation Tools for Co-Design                       | Prescriptive | Functional |
| Group Dynamics | Bridging Diversity       | 13  | Knowledge Dissemination for Diverse Stakeholder Groups               | Latent       | Functional |
| Group Dynamics | Bridging Diversity       | 14  | Tools for Bridging Scientific and Local Perspectives                 | Latent       | Functional |
| Group Dynamics | Bridging Diversity       | 15  | Bridging Professional-Citizen Communication Gap                      | Latent       | Functional |
| Group Dynamics | Bridging Diversity       | 16  | Bridging Communication Gaps Among Stakeholders                       | Latent       | Functional |
| Group Dynamics | Bridging Diversity       | 88  | Culturally Sensitive Digital Participation Tools                     | Latent       | Functional |
| Group Dynamics | Bridging Diversity       | 89  | Culturally Adaptable DPD Platforms                                   | Latent       | Functional |
| Group Dynamics | Bridging Diversity       | 109 | Platforms for Global and Inclusive Participation                     | Latent       | Functional |
| Group Dynamics | Bridging Diversity       | 110 | Digital Spaces for Multicultural Participation                       | Latent       | Functional |
| Group Dynamics | Bridging Diversity       | 111 | Communication Tools for Diverse Stakeholder Integration              | Latent       | Functional |
| Group Dynamics | Bridging Diversity       | 161 | Facilitation of Knowledge Transfer Between Youth and Decision-Makers | Articulated  | Functional |
| Group Dynamics | Bridging Diversity       | 185 | Broadened Participant Representation Tools                           | Articulated  | Functional |
| Group Dynamics | Bridging Diversity       | 186 | Intergenerational Collaboration Tools                                | Articulated  | Functional |
| Group Dynamics | Bridging Diversity       | 227 | Overcoming Language Barriers in International Citizen Science        | Inferred     | Functional |
| Group Dynamics | Bridging Diversity       | 241 | Adaptive Tools for Mixed-Ability Participation                       | Prescriptive | Functional |
| Group Dynamics | Bridging Diversity       | 272 | Multi-Language Translation Tools for Cross-Cultural PD               | Prescriptive | Functional |
| Group Dynamics | Understanding Sentiments | 113 | Tools for Monitoring Emotional Dynamics                              | Latent       | Functional |
| Group Dynamics | Understanding Sentiments | 116 | Non-Verbal Cue Recognition in Digital Platforms                      | Latent       | Functional |
| Group Dynamics | Understanding Sentiments | 118 | Real-Time Engagement and Emotional Cues                              | Latent       | Functional |
| Group Dynamics | Understanding Sentiments | 119 | Tools to Mitigate Interpersonal Participation Barriers               | Latent       | Functional |

|                    |                          |     |                                                                       |              |                |
|--------------------|--------------------------|-----|-----------------------------------------------------------------------|--------------|----------------|
| Group Dynamics     | Understanding Sentiments | 120 | Tools for Experience Exploration                                      | Latent       | Functional     |
| Group Dynamics     | Understanding Sentiments | 286 | Sentiment Analysis and Data Integration in Co-Design                  | Prescriptive | Functional     |
| Group Dynamics     | Understanding Sentiments | 287 | Advanced Sentiment Analysis and Summarization Tools                   | Prescriptive | Functional     |
| Group Dynamics     | Social dynamic           | 124 | Digital Tools for Collaboration and Team Building                     | Latent       | Functional     |
| Group Dynamics     | Social dynamic           | 125 | Research-Informed Design for Interactive Engagement                   | Latent       | Non-Functional |
| Group Dynamics     | Social dynamic           | 126 | Facilitation of Informal and Nonverbal Interactions in Virtual Spaces | Latent       | Functional     |
| Group Dynamics     | Social dynamic           | 127 | Remote Adaptations for Socio-Emotional Interaction                    | Latent       | Functional     |
| Group Dynamics     | Social dynamic           | 128 | Tools for Fostering Connectedness in DPD                              | Latent       | Functional     |
| Group Dynamics     | Social dynamic           | 129 | Careful Management of Heterogenous Co-Creators                        | Latent       | Non-Functional |
| Group Dynamics     | Social dynamic           | 130 | Rich Interaction Platforms for Enhanced Empathy                       | Latent       | Functional     |
| Group Dynamics     | Social dynamic           | 131 | Enhanced Utilization of Networked Structures for Co-Creation          | Latent       | Functional     |
| Group Dynamics     | Social dynamic           | 132 | Technologies for Facilitating Bonding and Deepening Dialogue          | Latent       | Functional     |
| Group Dynamics     | Social dynamic           | 133 | Audio-Visual Tools for Creating Inclusive Environments                | Latent       | Functional     |
| Group Dynamics     | Social dynamic           | 137 | Empathy-Driven Visual Technologies for Enhanced Awareness             | Latent       | Functional     |
| Group Dynamics     | Social dynamic           | 152 | Tools to Mitigate Team Dynamics Challenges in Collaborative Work      | Latent       | Functional     |
| Group Dynamics     | Social dynamic           | 218 | Empathy-Generating Tools for Conflict Mitigation                      | Articulated  | Functional     |
| Group Dynamics     | Social dynamic           | 240 | Counteracting Hate Speech                                             | Inferred     | Functional     |
| Group Dynamics     | Social dynamic           | 322 | Social Recommendation for Topic Highlighting and Collaboration        | Prescriptive | Functional     |
| Group Dynamics     | Social dynamic           | 323 | Integration of Discussion and Decision Spaces                         | Prescriptive | Functional     |
| Ensuring Integrity | Accessibility            | 1   | Increasing User Participation                                         | Latent       | Non-Functional |
| Ensuring Integrity | Accessibility            | 2   | Equitable Access to Technology for DPD                                | Latent       | Non-Functional |
| Ensuring Integrity | Accessibility            | 3   | Accessible Participation Tools                                        | Latent       | Non-Functional |
| Ensuring Integrity | Accessibility            | 4   | Integration of Group-Specific Requirements in Digital Tools           | Latent       | Functional     |
| Ensuring Integrity | Accessibility            | 5   | Integrative Approach for Public Participation                         | Latent       | Functional     |
| Ensuring Integrity | Accessibility            | 6   | Addressing the Digital Divide for Equal Participation                 | Latent       | Non-Functional |
| Ensuring Integrity | Accessibility            | 7   | Inclusive Digital Access Tools                                        | Latent       | Functional     |
| Ensuring Integrity | Accessibility            | 8   | Accessible Tools for Efficient Ideation In Online Setting             | Latent       | Functional     |

|                    |               |     |                                                                             |              |                |
|--------------------|---------------|-----|-----------------------------------------------------------------------------|--------------|----------------|
| Ensuring Integrity | Accessibility | 9   | Remote Alternatives for Inclusivity in PD                                   | Latent       | Functional     |
| Ensuring Integrity | Accessibility | 10  | Inclusive Digital Access                                                    | Latent       | Non-Functional |
| Ensuring Integrity | Accessibility | 11  | Accessible Participation Tools for Diverse Users                            | Latent       | Functional     |
| Ensuring Integrity | Accessibility | 12  | Inclusive Digital Learning Co-Design Tools for Children                     | Latent       | Functional     |
| Ensuring Integrity | Accessibility | 167 | Affordable and Accessible Technology Solutions                              | Articulated  | Non-Functional |
| Ensuring Integrity | Accessibility | 168 | Broad Participation in Data Collection Processes                            | Articulated  | Functional     |
| Ensuring Integrity | Accessibility | 169 | User-Friendly Interface for Diverse Participants                            | Articulated  | Non-Functional |
| Ensuring Integrity | Accessibility | 170 | Adaptive and Environment-Specific Solutions                                 | Articulated  | Non-Functional |
| Ensuring Integrity | Accessibility | 171 | Inclusive ICT Solutions for Public Spaces                                   | Articulated  | Non-Functional |
| Ensuring Integrity | Accessibility | 172 | Child-Inclusive Design Tools                                                | Articulated  | Non-Functional |
| Ensuring Integrity | Accessibility | 247 | Co-Design Tools for ASD-Focused Participatory Design                        | Prescriptive | Functional     |
| Ensuring Integrity | Accessibility | 248 | Child-Friendly Digital Tools for Remote Participation                       | Prescriptive | Functional     |
| Ensuring Integrity | Accessibility | 249 | Child-Centric PD Collaboration Tools                                        | Prescriptive | Functional     |
| Ensuring Integrity | Accessibility | 250 | Flexible Scheduling and Location Tools for Participation                    | Prescriptive | Functional     |
| Ensuring Integrity | Accessibility | 251 | Improved Age Group Adaptability in Platform Design                          | Prescriptive | Non-Functional |
| Ensuring Integrity | Accessibility | 258 | User-Friendly Data Collection Tools for Broad Participation                 | Prescriptive | Functional     |
| Ensuring Integrity | Accessibility | 259 | Child-Friendly Distributed Co-Design Tools                                  | Prescriptive | Functional     |
| Ensuring Integrity | Engagement    | 71  | User Engagement Features for Sustained Participation                        | Latent       | Functional     |
| Ensuring Integrity | Engagement    | 72  | Tools for Enhanced Online Engagement Monitoring                             | Latent       | Functional     |
| Ensuring Integrity | Engagement    | 73  | Improved Engagement and Quality Control in Digital Collaboration            | Latent       | Non-Functional |
| Ensuring Integrity | Engagement    | 74  | Comprehensive Platform for End-to-End Civic Engagement                      | Latent       | Functional     |
| Ensuring Integrity | Engagement    | 75  | Accessible and Flexible Civic Engagement Tools                              | Latent       | Functional     |
| Ensuring Integrity | Engagement    | 76  | Customizable Engagement Frameworks                                          | Latent       | Functional     |
| Ensuring Integrity | Engagement    | 77  | Interactive Digital Platforms for Active Citizen Involvement                | Latent       | Functional     |
| Ensuring Integrity | Engagement    | 78  | Comprehensive Technological Support for Stakeholder Engagement              | Latent       | Functional     |
| Ensuring Integrity | Engagement    | 79  | Tools for Enhanced Engagement and Inclusion in Digital Participatory Design | Latent       | Functional     |
| Ensuring Integrity | Engagement    | 80  | Tools for Active Stakeholder Engagement                                     | Latent       | Functional     |

|                    |                  |     |                                                                         |              |                |
|--------------------|------------------|-----|-------------------------------------------------------------------------|--------------|----------------|
| Ensuring Integrity | Engagement       | 99  | Context-Sensitive Participatory Modeling Frameworks                     | Latent       | Functional     |
| Ensuring Integrity | Engagement       | 175 | Engaging Hard-to-Reach Populations in Urban Planning                    | Articulated  | Functional     |
| Ensuring Integrity | Engagement       | 176 | Ensuring Engagement and Adequate Contributions via Platform Design      | Articulated  | Functional     |
| Ensuring Integrity | Engagement       | 177 | Enhanced Spatial Quality and Community Participation in Decision-Making | Articulated  | Functional     |
| Ensuring Integrity | Engagement       | 178 | Engagement and Data Management Tools                                    | Articulated  | Functional     |
| Ensuring Integrity | Engagement       | 179 | Mobile Technologies for Co-Creators Engagement in Co-Creation           | Articulated  | Functional     |
| Ensuring Integrity | Engagement       | 225 | Active User Engagement with Interactive Design Features                 | Inferred     | Non-Functional |
| Ensuring Integrity | Engagement       | 266 | Addressing Engagement, Data Management, and Internet Equity             | Prescriptive | Non-Functional |
| Ensuring Integrity | Engagement       | 267 | Continuous Engagement via e-Planning Platforms                          | Prescriptive | Functional     |
| Ensuring Integrity | Engagement       | 268 | User-Friendly Interaction Interfaces To Facilitate Participation        | Prescriptive | Non-Functional |
| Ensuring Integrity | Engagement       | 269 | Cost-Effective Engagement and Visualization Tools                       | Prescriptive | Functional     |
| Ensuring Integrity | Representativity | 100 | Transformative AI Support for Inclusive Planning                        | Latent       | Functional     |
| Ensuring Integrity | Representativity | 103 | Enhancing Collective Intelligence through Digital Tools                 | Latent       | Functional     |
| Ensuring Integrity | Representativity | 104 | Mitigating Risks of Manipulation, Centralized Power, and Privacy Breach | Latent       | Non-Functional |
| Ensuring Integrity | Representativity | 105 | Tools to Ensure Representative Participation in Co-Design               | Latent       | Functional     |
| Ensuring Integrity | Representativity | 106 | Tools for Minimizing Bias in Citizen Science                            | Latent       | Functional     |
| Ensuring Integrity | Representativity | 107 | Overcome Selection Bias Participants Group                              | Latent       | Non-Functional |
| Ensuring Integrity | Representativity | 108 | Addressing Inclusivity and Equity Challenges                            | Latent       | Non-Functional |
| Ensuring Integrity | Representativity | 112 | Tools for Democratizing Participation and Redistributing Power          | Latent       | Functional     |
| Ensuring Integrity | Representativity | 114 | Equity-Focused Tools to Prevent Process Domination                      | Latent       | Functional     |
| Ensuring Integrity | Representativity | 115 | Tools for Mitigating Power Asymmetries in Civic Design                  | Latent       | Functional     |
| Ensuring Integrity | Representativity | 195 | Bias Mitigation in Technology Design                                    | Articulated  | Non-Functional |
| Ensuring Integrity | Representativity | 197 | Mitigating Contributor Bias in Participation                            | Articulated  | Non-Functional |
| Ensuring Integrity | Representativity | 204 | Addressing Contribution Centralization                                  | Articulated  | Non-Functional |
| Ensuring Integrity | Representativity | 205 | Tool Mix for Reducing Selection Bias                                    | Articulated  | Non-Functional |
| Ensuring Integrity | Representativity | 206 | Secure and Equitable Collaborative Workflows                            | Articulated  | Non-Functional |
| Ensuring Integrity | Representativity | 278 | AI-Simulating Stakeholder Perspectives                                  | Prescriptive | Functional     |

|                    |                                 |     |                                                                              |              |                |
|--------------------|---------------------------------|-----|------------------------------------------------------------------------------|--------------|----------------|
| Ensuring Integrity | Representativity                | 279 | Reducing Self-Selection Bias                                                 | Prescriptive | Non-Functional |
| Ensuring Integrity | Representativity                | 280 | Multimodal Participant Selection                                             | Prescriptive | Functional     |
| Ensuring Integrity | Security and Privacy            | 117 | Privacy-Enhanced Tools for Data Security and Transparency                    | Latent       | Functional     |
| Ensuring Integrity | Security and Privacy            | 122 | Privacy and Security Solutions for Mobile Co-Creation                        | Latent       | Functional     |
| Ensuring Integrity | Security and Privacy            | 213 | Security Assurance in Collaborative Processes                                | Articulated  | Non-Functional |
| Ensuring Integrity | Security and Privacy            | 288 | Enhanced Security Features for CDMF                                          | Prescriptive | Non-Functional |
| Ensuring Integrity | Security and Privacy            | 289 | Secure Communication Platforms for Artifact Sharing                          | Prescriptive | Non-Functional |
| Ensuring Integrity | Security and Privacy            | 290 | Traceability Features with Privacy Safeguards                                | Prescriptive | Functional     |
| Ensuring Integrity | Security and Privacy            | 291 | Trusted Data Storage and Computation through DLT                             | Prescriptive | Functional     |
| Ensuring Integrity | Security and Privacy            | 292 | Advanced Encryption for Privacy and Anonymity                                | Prescriptive | Non-Functional |
| Ensuring Integrity | Security and Privacy            | 293 | Data Security and Usability                                                  | Prescriptive | Non-Functional |
| Ensuring Integrity | Security and Privacy            | 294 | Secure and Transparent Citizen Engagement Tools                              | Prescriptive | Non-Functional |
| Ensuring Integrity | Accountability and Transparency | 144 | Enhanced Transparency, Accountability, and Security in Digital Participation | Latent       | Non-Functional |
| Ensuring Integrity | Accountability and Transparency | 145 | Transparent Communication in Public Planning                                 | Latent       | Functional     |
| Ensuring Integrity | Accountability and Transparency | 146 | Digital Tools for Transparency and Collaboration                             | Latent       | Functional     |
| Ensuring Integrity | Accountability and Transparency | 147 | Transparency and Legitimacy through Information Sharing                      | Latent       | Non-Functional |
| Ensuring Integrity | Accountability and Transparency | 153 | Enhancing Transparency and Accountability                                    | Latent       | Non-Functional |
| Ensuring Integrity | Accountability and Transparency | 154 | Transparency and Trust-Building Mechanisms                                   | Latent       | Functional     |
| Ensuring Integrity | Accountability and Transparency | 155 | Transparent and Fair Decision-Making Tools                                   | Latent       | Functional     |
| Ensuring Integrity | Accountability and Transparency | 156 | Ensuring Transparency and Inclusion                                          | Latent       | Non-Functional |
| Ensuring Integrity | Accountability and Transparency | 157 | Solutions Transparency                                                       | Latent       | Non-Functional |
| Ensuring Integrity | Accountability and Transparency | 158 | Transparent Activity Tracking and Leadership Tools                           | Latent       | Functional     |



|                      |                                 |     |                                                                 |              |                |
|----------------------|---------------------------------|-----|-----------------------------------------------------------------|--------------|----------------|
| Ensuring Integrity   | Accountability and Transparency | 159 | IT Tools for Enhancing Accountability and Stakeholder Relations | Latent       | Functional     |
| Ensuring Integrity   | Accountability and Transparency | 160 | Data Usage Transparency Tools                                   | Latent       | Functional     |
| Ensuring Integrity   | Accountability and Transparency | 217 | Trust and Transparency Enhancement                              | Articulated  | Non-Functional |
| Ensuring Integrity   | Accountability and Transparency | 239 | Institutional Memory Tools for Transparent Participant History  | Inferred     | Functional     |
| Ensuring Integrity   | Accountability and Transparency | 327 | Scalable Blockchain-Based Accountability Tools for E-Government | Prescriptive | Functional     |
| Ensuring Integrity   | Accountability and Transparency | 328 | Secure Contribution Tracking and Safeguarding                   | Prescriptive | Functional     |
| Enabling Methodology | Decision-Making                 | 38  | Flexible Voting Methods for Context-Specific Decision-Making    | Latent       | Functional     |
| Enabling Methodology | Decision-Making                 | 39  | Accessible Decision-Making Models for Public Engagement         | Latent       | Functional     |
| Enabling Methodology | Decision-Making                 | 40  | Enhanced Digital Decision-Making Mechanisms                     | Latent       | Functional     |
| Enabling Methodology | Decision-Making                 | 41  | Accessible and Practical Decision Support Systems               | Latent       | Functional     |
| Enabling Methodology | Decision-Making                 | 42  | Empowerment Tools for Shared Decision-Making                    | Latent       | Functional     |
| Enabling Methodology | Decision-Making                 | 43  | Inclusive Decision-Making Processes                             | Latent       | Functional     |
| Enabling Methodology | Decision-Making                 | 183 | AI Integration for Enhanced Decision-Making                     | Articulated  | Functional     |
| Enabling Methodology | Decision-Making                 | 188 | Enhanced Participation In Decision Making Process               | Articulated  | Functional     |
| Enabling Methodology | Decision-Making                 | 189 | Advanced Decision Support System                                | Articulated  | Functional     |
| Enabling Methodology | Decision-Making                 | 297 | Decision-Support Tools for Civic Engagement                     | Prescriptive | Functional     |
| Enabling Methodology | Decision-Making                 | 298 | Reliable Digital Decision Support Systems                       | Prescriptive | Non-Functional |
| Enabling Methodology | Decision-Making                 | 299 | Automated Deliberative Process Monitoring Tools                 | Prescriptive | Functional     |
| Enabling Methodology | Decision-Making                 | 300 | Enhanced Deliberative Features for E-Planning                   | Prescriptive | Functional     |
| Enabling Methodology | Decision-Making                 | 301 | Technological Tools for Diverse Decision-Making                 | Prescriptive | Functional     |
| Enabling Methodology | Distributed Process             | 44  | Distributed Participatory Design Support                        | Latent       | Functional     |
| Enabling Methodology | Distributed Process             | 45  | Support for Flexible Distributed Participation                  | Latent       | Functional     |
| Enabling Methodology | Distributed Process             | 46  | Digital Systems for Public Participation and Education          | Latent       | Functional     |
| Enabling Methodology | Distributed Process             | 47  | Integration of Remote Methods in PD                             | Latent       | Functional     |

|                      |                        |     |                                                                |              |                |
|----------------------|------------------------|-----|----------------------------------------------------------------|--------------|----------------|
| Enabling Methodology | Distributed Process    | 48  | Simplified Remote Citizen Involvement                          | Latent       | Functional     |
| Enabling Methodology | Distributed Process    | 49  | Frameworks for Organizing Distributed Participatory Design     | Latent       | Functional     |
| Enabling Methodology | Distributed Process    | 190 | Accessible and Engaging Virtual Participation Platforms        | Articulated  | Non-Functional |
| Enabling Methodology | Distributed Process    | 191 | Enhanced Facilitation Tools for Distributed Co-Design          | Articulated  | Functional     |
| Enabling Methodology | Distributed Process    | 192 | Seamless Distributed Co-Design Tools                           | Articulated  | Functional     |
| Enabling Methodology | Distributed Process    | 302 | Hybrid Participation Tools for Augmenting In-Person Engagement | Prescriptive | Functional     |
| Enabling Methodology | New Methods            | 50  | Advanced Geospatial Tools for Complex Areas                    | Latent       | Functional     |
| Enabling Methodology | New Methods            | 51  | Development of Methods and Digital Tools for Online Workshops  | Latent       | Functional     |
| Enabling Methodology | New Methods            | 52  | Improved Online Workshops                                      | Latent       | Functional     |
| Enabling Methodology | New Methods            | 53  | Expanded E-Participation Frameworks                            | Latent       | Functional     |
| Enabling Methodology | New Methods            | 54  | Adaptive E-Participation Methods                               | Latent       | Functional     |
| Enabling Methodology | New Methods            | 55  | Standardized and Effective E-Participation Techniques          | Latent       | Functional     |
| Enabling Methodology | New Methods            | 56  | Bridging Theory and Practice through IT                        | Latent       | Functional     |
| Enabling Methodology | New Methods            | 194 | Participatory Mapping Technology                               | Articulated  | Functional     |
| Enabling Methodology | New Methods            | 198 | Integration of Emerging Technologies in DPD Tools              | Articulated  | Functional     |
| Enabling Methodology | New Methods            | 199 | Expanded Reach for Co-Design Techniques                        | Articulated  | Functional     |
| Enabling Methodology | Evidence-Based Process | 57  | Accessible Data for Informed Public Opinions                   | Latent       | Non-Functional |
| Enabling Methodology | Evidence-Based Process | 58  | Tools for Evidence-Based Communication Among Stakeholders      | Latent       | Functional     |
| Enabling Methodology | Evidence-Based Process | 59  | Knowledge-to-Policy Integration Tools                          | Latent       | Functional     |
| Enabling Methodology | Evidence-Based Process | 232 | Counteracting Misinformation                                   | Inferred     | Functional     |
| Enabling Methodology | Evidence-Based Process | 306 | Accessible Scientific Evidence through AI                      | Prescriptive | Functional     |
| Enabling Methodology | Evidence-Based Process | 307 | Accurate Data Collection and Analysis for Decision-Making      | Prescriptive | Functional     |
| Enabling Methodology | Evidence-Based Process | 308 | Reliable and Discrete Information                              | Prescriptive | Non-Functional |
| Enabling Methodology | Evidence-Based Process | 309 | NLP for Policy Narrative Analysis                              | Prescriptive | Functional     |
| Enabling Methodology | Large Scale Process    | 60  | Digital Tools for Large-Scale Creative Public Participation    | Latent       | Functional     |
| Enabling Methodology | Large Scale Process    | 61  | Scalable Co-Design Practices for Broad Public Engagement       | Latent       | Non-Functional |
| Enabling Methodology | Large Scale Process    | 68  | Scalable Digital Participation Channels                        | Latent       | Non-Functional |

|                      |                     |     |                                                                                    |              |                |
|----------------------|---------------------|-----|------------------------------------------------------------------------------------|--------------|----------------|
| Enabling Methodology | Large Scale Process | 69  | Large-Scale Participant Inclusion                                                  | Latent       | Non-Functional |
| Enabling Methodology | Large Scale Process | 70  | Structured Approaches for Asynchronous Participation in Large Distributed Projects | Latent       | Functional     |
| Enabling Methodology | Large Scale Process | 90  | Scalable Digital Participation Solutions                                           | Latent       | Non-Functional |
| Enabling Methodology | Large Scale Process | 203 | Scalable Co-Design Tools for Large-Scale Public Engagement                         | Articulated  | Non-Functional |
| Enabling Methodology | Large Scale Process | 317 | Feedback Management and Moderation Tools for Large-Scale Participation             | Prescriptive | Functional     |
| Enabling Methodology | Large Scale Process | 318 | Ubiquitous Tools for Large-Scale Data Collection                                   | Prescriptive | Functional     |
| Enabling Methodology | Large Scale Process | 319 | High-Volume Online Participation Tools                                             | Prescriptive | Functional     |
| Enabling Methodology | Specific Tools      | 91  | General-Purpose Participatory Planning System                                      | Latent       | Functional     |
| Enabling Methodology | Specific Tools      | 92  | Integrated System for Public Participation                                         | Latent       | Functional     |
| Enabling Methodology | Specific Tools      | 93  | Ubiquitous Digital Tools for Citizen Science Integration                           | Latent       | Functional     |
| Enabling Methodology | Specific Tools      | 94  | Holistic Collaborative Platform for Co-Production                                  | Latent       | Functional     |
| Enabling Methodology | Specific Tools      | 95  | Comprehensive Digital Toolkits for Co-Design                                       | Latent       | Functional     |
| Enabling Methodology | Specific Tools      | 96  | Increased Empirical Applications of Co-Creation Tools                              | Latent       | Non-Functional |
| Enabling Methodology | Specific Tools      | 97  | Development of Customized Native Technologies                                      | Latent       | Functional     |
| Enabling Methodology | Specific Tools      | 98  | Adaptive Systems for Dynamic User Requirements                                     | Latent       | Functional     |
| Enabling Methodology | Specific Tools      | 207 | Systems for Dedicated Participatory Design Support                                 | Articulated  | Functional     |
| Enabling Methodology | Specific Tools      | 208 | Digital System for Decision-Making Support in Urban Design                         | Articulated  | Functional     |
| Enabling Methodology | Specific Tools      | 209 | Integrated Digital System for Urban Design Communication and Collaboration         | Articulated  | Functional     |
| Enabling Methodology | Specific Tools      | 210 | Advanced Digital Tools for Urban Stakeholder Participation                         | Articulated  | Functional     |
| Enabling Methodology | Specific Tools      | 211 | Open-Ended and Tailorable Software Environments                                    | Articulated  | Functional     |
| Enabling Methodology | Specific Tools      | 234 | Integrated and Usable Solutions for Sustainable Planning                           | Inferred     | Functional     |
| Enabling Methodology | Specific Tools      | 326 | Stage-Specific Digital Tools for Public Participation                              | Prescriptive | Functional     |
| Process Management   | Data Management     | 30  | Enhanced Data Collection and Analysis Capabilities                                 | Latent       | Functional     |
| Process Management   | Data Management     | 34  | Data Aggregation and Analysis Tools for Civic Engagement                           | Latent       | Functional     |
| Process Management   | Data Management     | 35  | Data Collection and Knowledge Transfer Tools                                       | Latent       | Functional     |
| Process Management   | Data Management     | 36  | Digitized Data Aggregation and Analysis Tools                                      | Latent       | Functional     |
| Process Management   | Data Management     | 37  | AI-Enhanced Crowdsourced Data Science Tools                                        | Latent       | Functional     |

|                    |                           |     |                                                                |              |            |
|--------------------|---------------------------|-----|----------------------------------------------------------------|--------------|------------|
| Process Management | Data Management           | 102 | Digital Support for Idea Analysis and Organization             | Latent       | Functional |
| Process Management | Data Management           | 166 | User-Centered Geospatial Data Collection Tools                 | Articulated  | Functional |
| Process Management | Data Management           | 173 | Data Management Tools                                          | Articulated  | Functional |
| Process Management | Data Management           | 182 | Enhanced Integration of GIS Tools for Urban Planning           | Articulated  | Functional |
| Process Management | Data Management           | 221 | Data Management and Filtering Tools for Crowdsourced Data      | Inferred     | Functional |
| Process Management | Data Management           | 222 | High-Accuracy Data Collection and Validation Tools             | Inferred     | Functional |
| Process Management | Data Management           | 223 | Standardized and Integrated Data Platforms                     | Inferred     | Functional |
| Process Management | Data Management           | 226 | E-Planning GIS for Multi-Dimensional Impact Assessment         | Inferred     | Functional |
| Process Management | Data Management           | 228 | Automated Idea Organization in Participatory Design            | Inferred     | Functional |
| Process Management | Data Management           | 253 | Advanced Data Processing Capabilities                          | Prescriptive | Functional |
| Process Management | Data Management           | 254 | Enhanced Data Analysis Technology in Co-Creation               | Prescriptive | Functional |
| Process Management | Data Management           | 255 | Comprehensive Data Management and Engagement Tools             | Prescriptive | Functional |
| Process Management | Data Management           | 256 | Real-Time Data Collection Capabilities                         | Prescriptive | Functional |
| Process Management | Data Management           | 257 | Multi-Format Data Collection Tools                             | Prescriptive | Functional |
| Process Management | Data Management           | 264 | Data Analytics for Participatory Platforms                     | Prescriptive | Functional |
| Process Management | Data Management           | 265 | NLP for Data Synthesis and Categorization in Planning          | Prescriptive | Functional |
| Process Management | Data Management           | 270 | GIS Integration for Urban Impact Assessment                    | Prescriptive | Functional |
| Process Management | Data Management           | 277 | Integrated Web-GIS Tools                                       | Prescriptive | Functional |
| Process Management | Information and Knowledge | 121 | Tools for Evaluating Unstructured Feedback                     | Latent       | Functional |
| Process Management | Information and Knowledge | 212 | Developer's Blog for Ongoing Project Updates                   | Articulated  | Functional |
| Process Management | Information and Knowledge | 231 | Tools for Summarizing and Structuring Discussion Threads       | Inferred     | Functional |
| Process Management | Information and Knowledge | 281 | Improved Information Management Systems for Stakeholder Access | Prescriptive | Functional |
| Process Management | Information and Knowledge | 282 | NLP-Based Relevance Scoring for Contribution Filtering         | Prescriptive | Functional |
| Process Management | Information and Knowledge | 283 | Information Management Tools for Co-Creation                   | Prescriptive | Functional |
| Process Management | Information and Knowledge | 284 | Semantization Tools for Knowledge Structuring                  | Prescriptive | Functional |
| Process Management | Information and Knowledge | 285 | Digital Platform for Co-Design Knowledge and Guidance          | Prescriptive | Functional |
| Process Management | Process Optimisation      | 123 | Resource-Efficient Digital Facilitation Tools for Co-Design    | Latent       | Functional |

|                    |                      |     |                                                                  |              |                |
|--------------------|----------------------|-----|------------------------------------------------------------------|--------------|----------------|
| Process Management | Process Optimisation | 134 | Flexible Participation Tools for Improved Engagement             | Latent       | Functional     |
| Process Management | Process Optimisation | 135 | Decision Chain Acceleration Tools                                | Latent       | Functional     |
| Process Management | Process Optimisation | 136 | NLP Tools for Ideation and Evaluation                            | Latent       | Functional     |
| Process Management | Process Optimisation | 138 | Overcoming Geographic and Financial Barriers in PD               | Latent       | Non-Functional |
| Process Management | Process Optimisation | 139 | Improving Implementation Processes                               | Latent       | Non-Functional |
| Process Management | Process Optimisation | 140 | Enhancing Capacity for Proposal Processing                       | Latent       | Non-Functional |
| Process Management | Process Optimisation | 141 | Efficient Co-Creation Processes Upholding Democratic Principles  | Latent       | Non-Functional |
| Process Management | Process Optimisation | 214 | Digital System for Simplified Public Participation               | Articulated  | Functional     |
| Process Management | Process Optimisation | 215 | Multi-Tool Resource Efficiency                                   | Articulated  | Non-Functional |
| Process Management | Process Optimisation | 216 | Outcome Assessment for Improvement                               | Articulated  | Functional     |
| Process Management | Process Optimisation | 236 | Reduction of Tedious Steps in Participatory Processes            | Inferred     | Non-Functional |
| Process Management | Process Optimisation | 237 | Time-Efficient and Cost-Effective Digital Collaboration Tools    | Inferred     | Non-Functional |
| Process Management | Process Optimisation | 275 | AI-Based Tools for Input and Feedback Evaluation                 | Prescriptive | Functional     |
| Process Management | Process Optimisation | 276 | Automatic Title Generation and Summarization Tools               | Prescriptive | Functional     |
| Process Management | Organisation         | 142 | Technology-Enhanced Participant Recruitment and Retention        | Latent       | Functional     |
| Process Management | Organisation         | 143 | Cross-Organizational Coordination Tools                          | Latent       | Functional     |
| Process Management | Organisation         | 148 | Real-Time Interactive AI                                         | Latent       | Functional     |
| Process Management | Organisation         | 149 | Integrated Management Tools for E-Participation Components       | Latent       | Functional     |
| Process Management | Organisation         | 150 | Comprehensive Process Representation Tools                       | Latent       | Functional     |
| Process Management | Organisation         | 151 | ML and AI-Enhanced Facilitation Tools                            | Latent       | Functional     |
| Process Management | Organisation         | 238 | Feedback Capture Mechanisms for In-Person Engagement             | Inferred     | Functional     |
| Process Management | Organisation         | 320 | AI Tools for Facilitation and Analysis in DPD                    | Prescriptive | Functional     |
| Process Management | Organisation         | 321 | Targeted Digital Platforms for Co-Design Tasks                   | Prescriptive | Functional     |
| Process Management | Organisation         | 324 | Integrated Workspace for Information Sharing and Task Management | Prescriptive | Functional     |
| Process Management | Organisation         | 325 | Effective Contribution Management                                | Prescriptive | Functional     |
